# Supplementary material
Source: publisher site journal article supplement (https://www.dovepress.com/article/596477)
Supplement: Supplementary file 1 [file 596477%20Revised%20Supplementary%20Material.docx]

**Supplementary Table S1** Baseline Clinical and Demographic Characteristics of the GSE76925

| Variables | Total  (n = 151) | Control  (n = 40) | COPD  (n = 111) | *P-*valuea |
| --- | --- | --- | --- | --- |
| Age(year, median [IQR]) | 63(60,67) | 66(60,72) | 63(60,67) | 0.061 |
| Gender, n(%) |  |  |  | 0.737 |
| Female(%) | 84(56) | 25(63) | 59(53) |  |
| Male(%) | 67(44) | 15(37) | 52(47) |  |
| BMI (kg/m²), Median [IQR] | 26(23, 30) | 28(25, 31) | 25(22, 29) | 0.014 |
| Smoking (pack-years), Median [IQR] | 47(36, 70) | 31(19, 45) | 55(42, 78) | < 0.001 |
| %predicted FEV1, Median [IQR] | 30(21, 82) | 98(87, 106) | 25(19, 32) | < 0.001 |
| %PredictedFEV1/FVC | 34(27,72) | 78(74,81) | 30(25,37) | < 0.001 |

**Notes:** a Comparison between Control and COPD. BMI, body mass index; FEV1, forced expiratory volume in 1 second; FVC, forced vital capacity; IQR, interquartile range.


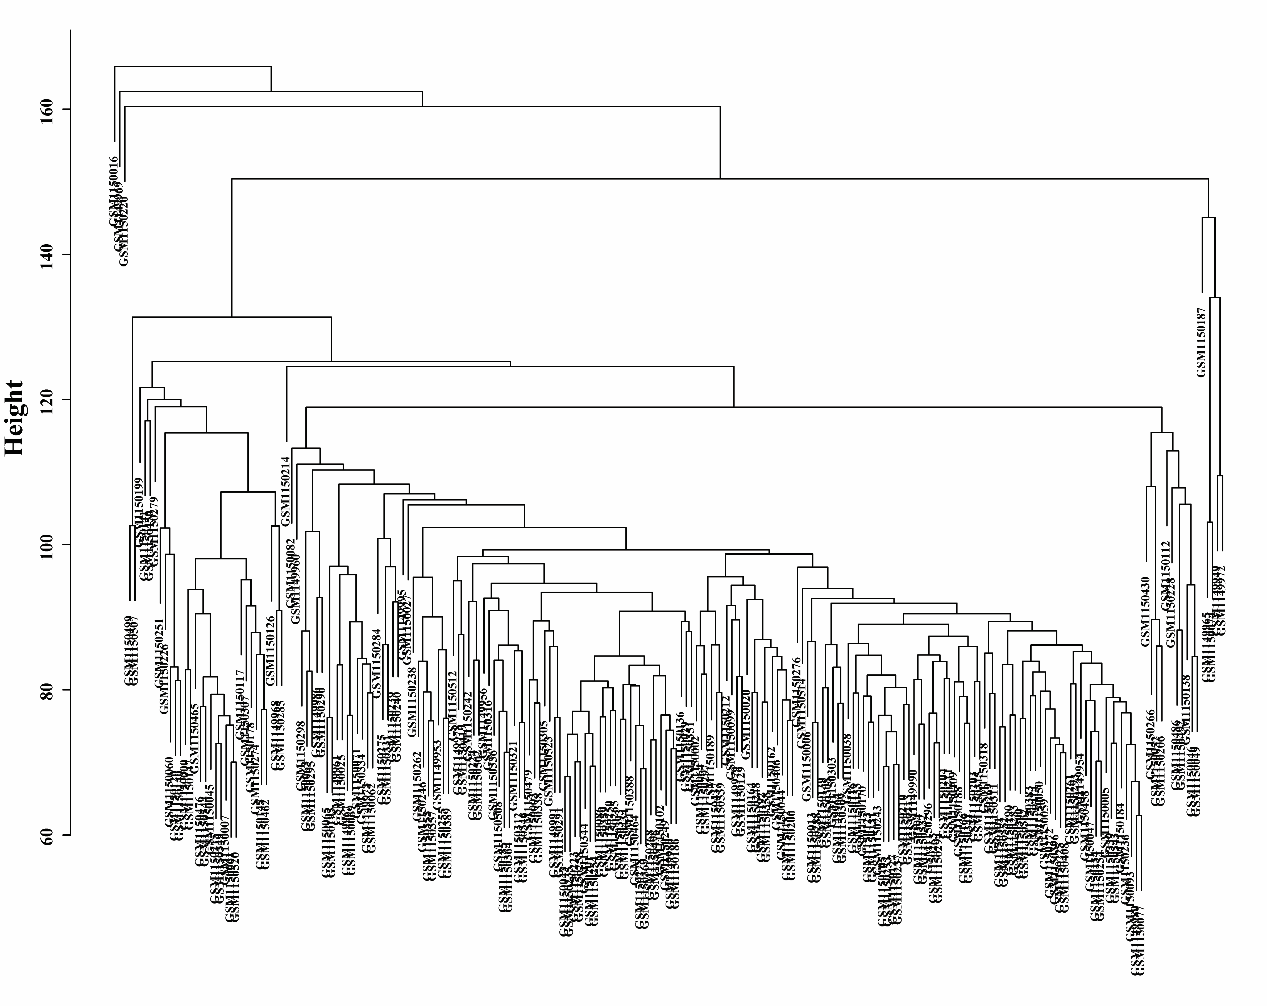
**Supplementary Fig S1.** Sample hierarchical clustering dendrogram of the GSE47460 discovery cohort for quality control and outlier detection.


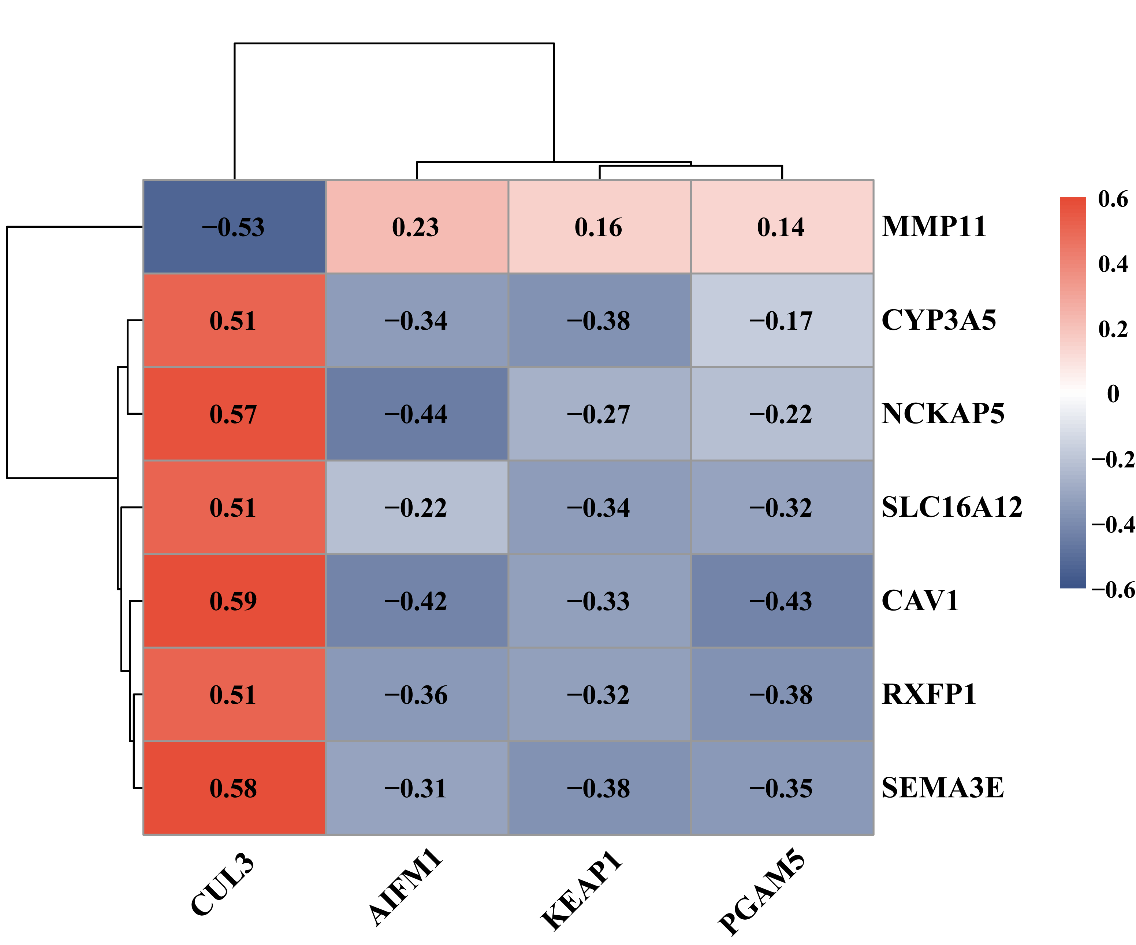


**Supplementary Fig S2**. Pairwise Pearson correlation matrix between the identified 7 ORDEGs and 4 canonical oxeiptosis seed markers.


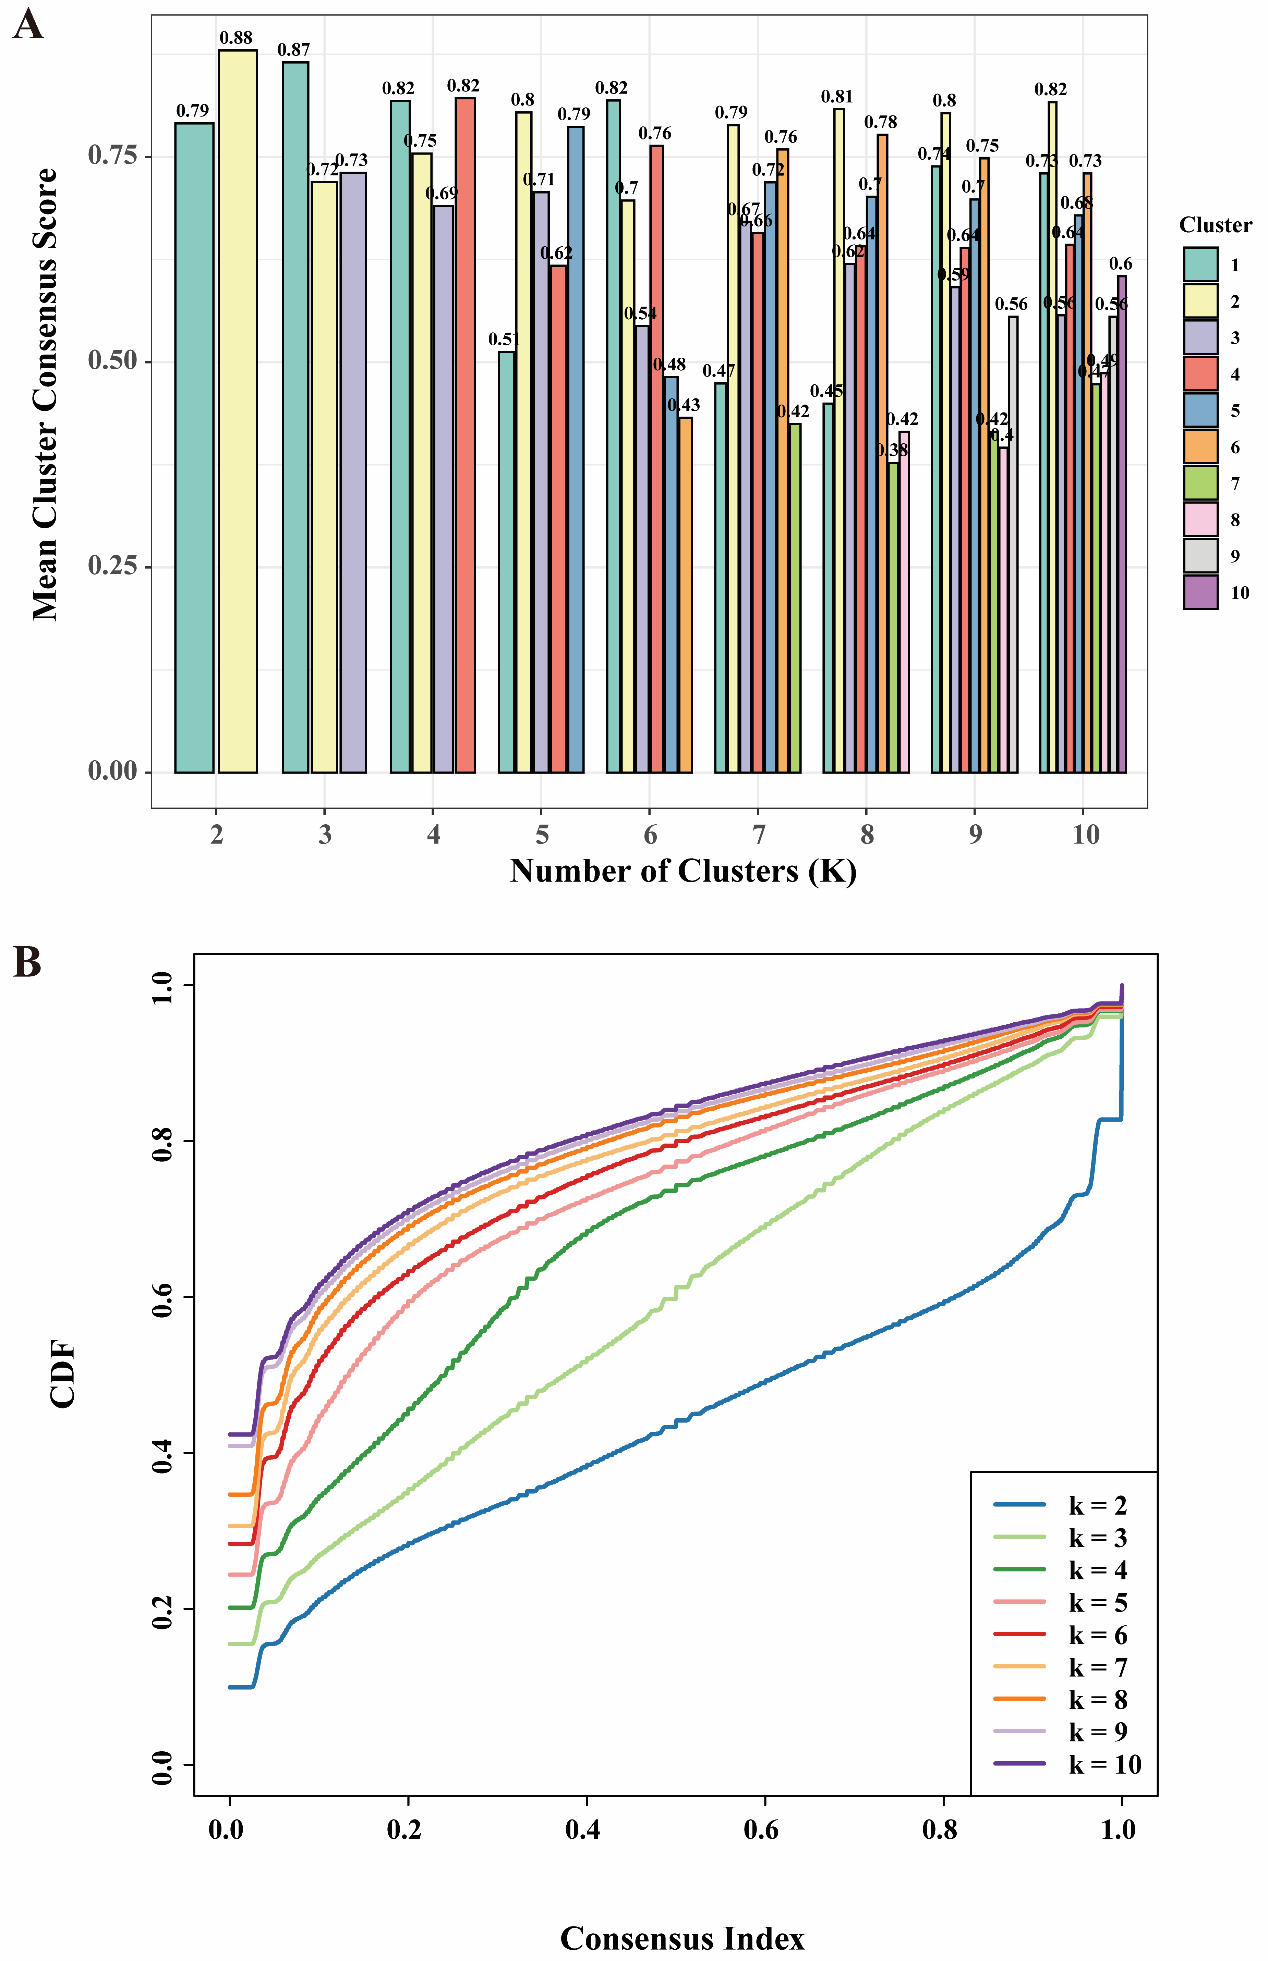
**Supplementary Fig S3.** Quantitative assessment of consensus clustering stability. (A) Consensus Cumulative Distribution Function (CDF) plot for *k*=2 to *k*=10; (B) Average cluster-consensus scores across different *k* values.
